# Supplementary material for: A new species of jupati, genusMetachirusBurmeister 1854 (Didelphimorphia, Didelphidae) for the Brazilian Amazon
Source: publisher site journal article supplement (doi:10.1515/mammalia-2021-0176), 2023-01-09
Supplement: Supplementary file 1 [file j_mammalia-2021-0176_suppl.docx]

**Supplementary Material**

**A new species of jupati, genus *Metachirus* Burmeister 1854 (Didelphimorphia, Didelphidae) for the Brazilian Amazon**

Cleuton Lima Miranda et al.

DOI 10.1515/mammalia-2021-0176

**Supplementary Appendix 1:** List of material examined, except *Metachirus aritanai* new species which was presented in the formal description.

*Metachirus nudicaudatus*

BRAZIL - **Amapá**: Municipality of Serra do Navio, Igarapé do Ouro MN 20229; Serra do Navio MN 20234, 20142, 20204; 20206; Teresinha, Amapari River MN 20203, 20235, 20230, 20232, 20233, 20202, 20207, 20228; 20231, 20205, MPEG 12922, 12926. **Pará**: Sacarazinho River, Oriximiná MPEG 10441, 10105, 10440, 10104, 10439, 10443, 10442. FRENCH GUYANNA. **Paracou**: AMNH 266451, 267009, 267010 (photography).

*Metachirus myosuros* (*sensu* present study)

BRAZIL - **Alagoas**: Usina Caeté, São Miguel dos Campos MN 30571, MN 30573; MN 17182, MN 30572. **Bahia**: Fazenda Brejo Grande, Itabuna MN 31454; Municipality of Ilhéus MN 11370, MN 11354, MN 11367, MN 11380; Ribeirão da Fortuna, Buerarema MN 11375, MN 11361, MN 11364, MN17196, MN11360, MN 1365, MN 11369, MN 11376. **Espírito Santo**: Estação Biológica de Santa Lúcia, Santa Teresa MN 31425, MN 25992; Morro da Argola, Vila Velha MN 3985, MN 5579, MN 5580, MN 5581; Santa Ana, Lagoa Juparanã, Linhares MN 1214; Serra MN 11713; MN 11670, MN 11714. **Pernambuco**: Parque Dois Irmãos, Recife MN 8281, MN 8201, MN 8200. **Piauí**: Fazenda Nazareth, José de Freitas MPEG 36872. **Rio de** **Janeiro**: Angra dos Reis MN 1213, MN 1220; Araruama MN 25991; Município de Magé MN 42791; Mambucaba, Angra dos Reis MN 42772, MN 42773, MN 42774; Parati MN 62192; Pendotiba, Niterói MN 29951; Rio de Janeiro MN 5603, MN 5612, MN 5806, MN 10246, MN 10253, MN 10254, MN 25993, MN 10247, MN 1218, MN 5805, MN 10245, MN 10249, MN 10251; Serra dos Órgãos MN 42792. **São Paulo**: Fazenda Intervales MZUSP 27230; Fazenda Capricórnio, Ubatuba MZUSP 29193; Bertioga Praia do Iporanga MZUSP 9865; Bertioga MZUSP 10204, 10205; Bauru MZUSP 471; Reserva Florestal de Caraguatatuba MZUSP 9785; Itapura MZUSP 1874.

*Metachirus* spp. (new species or taxa to be revalidated pending comprehensive systematic review)

BRAZIL - **Acre**: Fazenda Santa Fé, left bank of the Juruá River MPEG 28075; Igarapé Porongaba, right bank of the Juruá River MPEG 28076, MPEG 28077, MPEG 28079, MPEG 28080, MPEG 28078; Nova Vida, right bank of the Juruá River, INPA 2981, INPA 2987; Sena Madureira: MPEG 10713, MPEG 10714, MPEG 10719, MPEG 10722, MPEG 10721, MPEG 10572, MPEG 10710, MPEG 10723, MPEG 10574, MPEG 10712, MPEG 12924, MPEG 10571, MPEG 10573, MPEG 10709, MPEG 10711, MPEG 10715, MPEG 10716, MPEG 10717, MPEG 10718, MPEG 10720, MPEG 10724, MPEG 12920; Sobral, left bank of the Juruá River INPA 2982, INPA 2986. **Amazonas**: Altamira, right bank of the Juruá River INPA 2980, MPEG 28081; Barro Vermelho, left bank of the Juruá River INPA 2995, INPA 2994; Colocação Vira-Volta, left bank of the Juruá River. INPA 2983; MPEG 28073, MPEG 28074; Ilha Paxiuba, right bank of the Juruá River MPEG 28069; Lago Vai QuemQuer, right bank of the Juruá River MPEG 28070; Penedo, right bank of the Juruá River MPEG 28071, INPA 2993, INPA 2990, INPA 2991, INPA 2988, INPA 2989, INPA 2992; MPEG 28072; Macaco, left bank of the Jaú River INPA 4309, INPA 4377, INPA 4378, INPA 4429, INPA 4310, INPA 4311, INPA 4312, INPA 4431; Right bank of the Jaú River, above the mouth INPA 4162, INPA 4313, INPA 4379, INPA 4493, INPA4161, INPA 4433, INPA 4494; Parque Nacional do Pico da Neblina, São Gabriel da Cachoeira INPA 2516, INPA 2517; Tambor, left bank of the Jaú River INPA 4159; INPA 4160. Igarapé Caititu, right bank of the Uatumã River INPA 647, INPA 740; Lago Meduinim, left bank of the Negro River INPA 4528; Municipality of Manaus INPA 178, INPA 179, INPA 193; Rodovia AM 10 (Manaus- Itacotiara), KM 46. MPEG 7163, MPEG 7164; Projeto de Dinâmica Biológica em Fragmentos Florestais (PDBFF), Manaus INPA 1782, INPA 1781, INPA 1784, INPA 1785; Uatumã River, Usina Hidrelétrica de Balbina MPEG 22140, MN 26926. **Mato Grosso**: Reserva Ecológica Cristalino, Alta Floresta UFMG 2657 (photography); Humboldt, Aripuanã River MPEG 10175, MPEG 10176. **Pará**: Itaituba MPEG 8094, MPEG 15243, MPEG 8096, MPEG 15242. **Rondônia**: BR 364, KM 54, Porto Velho INPA 174, INPA 175; Cachoeira Nazaré MPEG 20752, MPEG 20753; Pirocoluína MN 1212; Usina Hidrelétrica Samuel MPEG 22555, MPEG 22563. BR 14, KM 94, Capim MPEG 8098, 8099, 15260, 8100, 15240, 15241; Curuá-una MPEG 8975, 8976, 8978, 15431, 15432, 15463, 8977, 15429, 15430; Fordlândia MN 4793; Igarapé Açu MPEG 2556; Ilha do Arapiranga Primavera MN 42976, MN 42977; Jatobal, Marabá MPEG 8979, MPEG 8980, MPEG 8981; município de Belém MPEG 12921, MPEG 12925, MNRJ 1217, MPEG 12923; BR 316 Belém – Brasília, KM 92; MPEG 1758; Utinga. MPEG 2664, MPEG 2557, MPEG 1068, MPEG 2555, MPEG 2559; MPEG 2554, MPEG 2560, MPEG 2553, MPEG 2558; Nova Timboteua MN 26889, MN 26890, MN 26891; Outeiro, Maguari MPEG 25401; Santarém MPEG 3380, MPEG 8093, MPEG 10152, MPEG 8095; São Miguel do Guamá MPEG 1590; Usina Hidrelétrica Cachoeira Porteira INPA 399, INPA 406; INPA 651.
